# Supplementary material for: Tissue-Specific Expression of the Terpene Synthase Family Genes in Rosa chinensis and Effect of Abiotic Stress Conditions
Source: MDPI journal article supplement (doi:10.3390/genes13030547), 2022-03-20
Supplement: s1 [file s1]

# Supplementary Materials

## Tissue-Specific Expression of the Terpene Synthase Family Genes in *Rosa chinensis* and Effect of Abiotic Stress Conditions

Yuhang Yan <sup>1</sup>, Mouliang Li <sup>1</sup>, Xiaoni Zhang <sup>3</sup>, Weilong Kong <sup>3</sup>, Mohammed Bendahmane <sup>2</sup>,  
Manzhu Bao <sup>1</sup> and Xiaopeng Fu <sup>1,\*</sup>

<sup>1</sup> Key Laboratory of Horticultural Plant Biology, Ministry of Education, College of Horticulture and Forestry Sciences, Huazhong Agricultural University, Wuhan 430070, China

<sup>2</sup> Laboratoire Reproduction et Développement des Plantes, UMR INRAE-CNRS-Lyon1-ENSL, Ecole Normale Supérieure Lyon, 69364 Lyon, France

<sup>3</sup> Guangdong Laboratory for Lingnan Modern Agriculture, Genome Analysis Laboratory of the Ministry of Agriculture, Agricultural Genomics Institute at Shenzhen, Chinese Academy of Agricultural Sciences, Shenzhen, Guangdong 518120, China

\* Correspondence to: Xiaopeng Fu, [fuxiaopeng@mail.hzau.edu.cn](mailto:fuxiaopeng@mail.hzau.edu.cn); Telephone: 86-159-2625-8658;

Fax: 86-027-8728-2010

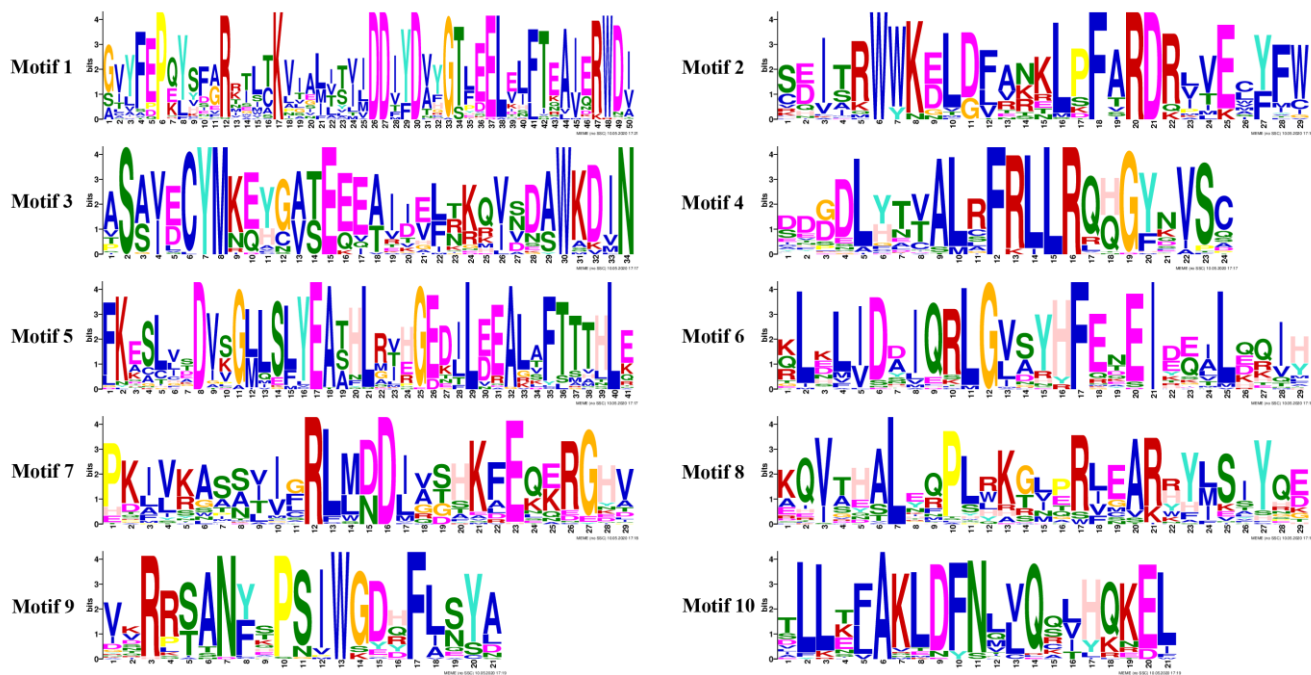

**Figure S1.** Ten conserved motifs in RcTPS proteins identified by MEME tool.

**Table S1.** Accession number of the TPS proteins represented in phylogenetic analysis.

| Species                     | Gene ID        | Accession number |
|-----------------------------|----------------|------------------|
| <i>Arabidopsis thaliana</i> | <i>AtTPS01</i> | AT4G15870.1      |
|                             | <i>AtTPS02</i> | AT4G16730.1      |
|                             | <i>AtTPS03</i> | AT4G16740.1      |
|                             | <i>AtTPS04</i> | AT1G61120.1      |
|                             | <i>AtTPS05</i> | AT2G23230.1      |
|                             | <i>AtTPS06</i> | AT1G70080.1      |
|                             | <i>AtTPS07</i> | AT4G20200.1      |
|                             | <i>AtTPS08</i> | AT4G20210.1      |
|                             | <i>AtTPS09</i> | AT4G20230.1      |
|                             | <i>AtTPS10</i> | AT2G24210.1      |
|                             | <i>AtTPS11</i> | AT5G44630.1      |
|                             | <i>AtTPS12</i> | AT4G13280.1      |
|                             | <i>AtTPS13</i> | AT4G13300.1      |
|                             | <i>AtTPS14</i> | AT1G61680.1      |
|                             | <i>AtTPS15</i> | AT3G29190.1      |
|                             | <i>AtTPS16</i> | AT3G29110.1      |
|                             | <i>AtTPS17</i> | AT3G14490.1      |
|                             | <i>AtTPS18</i> | AT3G14520.1      |
|                             | <i>AtTPS19</i> | AT3G14540.1      |
|                             | <i>AtTPS20</i> | AT5G48110.1      |
|                             | <i>AtTPS21</i> | AT5G23960.1      |
|                             | <i>AtTPS22</i> | AT1G33750.1      |
|                             | <i>AtTPS23</i> | AT3G25830.1      |
|                             | <i>AtTPS24</i> | AT3G25810.1      |
|                             | <i>AtTPS25</i> | AT3G29410.1      |
|                             | <i>AtTPS26</i> | AT1G66020.1      |
|                             | <i>AtTPS27</i> | AT3G25820.1      |
|                             | <i>AtTPS28</i> | AT1G48800.1      |
|                             | <i>AtTPS29</i> | AT1G31950.1      |
|                             | <i>AtTPS30</i> | AT3G32030.1      |
|                             | <i>AtTPS31</i> | AT4G02780.1      |
|                             | <i>AtTPS32</i> | AT1G79460.1      |
| <i>Solanum lycopersicum</i> | <i>SlTPS03</i> | Solyc01g105870   |
|                             | <i>SlTPS04</i> | Solyc01g105880   |
|                             | <i>SlTPS05</i> | Solyc01g105890   |
|                             | <i>SlTPS07</i> | Solyc01g105920   |
|                             | <i>SlTPS08</i> | Solyc01g105960   |
|                             | <i>SlTPS09</i> | Solyc06g059885   |
|                             | <i>SlTPS10</i> | Solyc06g059910   |
|                             | <i>SlTPS12</i> | Solyc06g059930   |
|                             | <i>SlTPS14</i> | Solyc09g092470   |
|                             | <i>SlTPS16</i> | Solyc07g008680   |

|                        |                |                |
|------------------------|----------------|----------------|
|                        | <i>SITPS17</i> | Solyc12g006570 |
|                        | <i>SITPS18</i> | Solyc08g005720 |
|                        | <i>SITPS19</i> | Solyc08g005670 |
|                        | <i>SITPS20</i> | Solyc08g005665 |
|                        | <i>SITPS21</i> | Solyc08g005640 |
|                        | <i>SITPS24</i> | Solyc07g066670 |
|                        | <i>SITPS25</i> | Solyc02g079890 |
|                        | <i>SITPS27</i> | Solyc02g079910 |
|                        | <i>SITPS28</i> | Solyc04g054380 |
|                        | <i>SITPS31</i> | Solyc01g101170 |
|                        | <i>SITPS32</i> | Solyc01g101180 |
|                        | <i>SITPS33</i> | Solyc01g101190 |
|                        | <i>SITPS35</i> | Solyc01g101210 |
|                        | <i>SITPS36</i> | Solyc06g060180 |
|                        | <i>SITPS37</i> | Solyc10g005410 |
|                        | <i>SITPS38</i> | Solyc02g079840 |
|                        | <i>SITPS39</i> | Solyc10g005390 |
|                        | <i>SITPS40</i> | Solyc06g084240 |
|                        | <i>SITPS41</i> | Solyc08g005710 |
|                        | <i>SITPS46</i> | Solyc03g006550 |
|                        | <i>SITPS47</i> | Solyc03g007730 |
|                        | <i>SITPS48</i> | Solyc04g051620 |
| <i>Malus domestica</i> | <i>MdTPS01</i> | MDP0000120176  |
|                        | <i>MdTPS04</i> | MDP0000130635  |
|                        | <i>MdTPS05</i> | MDP0000161084  |
|                        | <i>MdTPS06</i> | MDP0000203143  |
|                        | <i>MdTPS07</i> | MDP0000205617  |
|                        | <i>MdTPS08</i> | MDP0000225361  |
|                        | <i>MdTPS09</i> | MDP0000233869  |
|                        | <i>MdTPS11</i> | MDP0000248152  |
|                        | <i>MdTPS12</i> | MDP0000265187  |
|                        | <i>MdTPS13</i> | MDP0000274847  |
|                        | <i>MdTPS14</i> | MDP0000274848  |
|                        | <i>MdTPS15</i> | MDP0000276976  |
|                        | <i>MdTPS16</i> | MDP0000295452  |
|                        | <i>MdTPS17</i> | MDP0000317119  |
|                        | <i>MdTPS19</i> | MDP0000670935  |
|                        | <i>MdTPS20</i> | MDP0000702120  |
|                        | <i>MdTPS21</i> | MDP0000746466  |
|                        | <i>MdTPS24</i> | MDP0000154813  |
|                        | <i>MdTPS25</i> | MDP0000199152  |
|                        | <i>MdTPS27</i> | MDP0000322688  |
|                        | <i>MdTPS30</i> | MDP0000147908  |
|                        | <i>MdTPS38</i> | MDP0000321353  |

---

|                |               |
|----------------|---------------|
| <i>MdTPS39</i> | MDP0000192151 |
| <i>MdTPS40</i> | MDP0000192374 |
| <i>MdTPS42</i> | MDP0000227442 |
| <i>MdTPS44</i> | MDP0000318427 |
| <i>MdTPS46</i> | MDP0000828007 |
| <i>MdTPS47</i> | MDP0000245233 |
| <i>MdTPS48</i> | MDP0000267906 |
| <i>MdTPS49</i> | MDP0000293842 |
| <i>MdTPS50</i> | MDP0000298903 |
| <i>MdTPS51</i> | MDP0000308115 |
| <i>MdTPS52</i> | MDP0000398063 |
| <i>MdTPS53</i> | MDP0000561715 |
| <i>MdTPS54</i> | MDP0000562538 |

---

TPS proteins from *A. thaliana*, *S. lycopersicum* and *M. domestica* were obtained from their genome database. *A. thaliana*: <https://www.arabidopsis.org/>; *S. lycopersicum*: <https://solgenomics.net/>; *M. domestica*: <https://www.rosaceae.org/>.

**Table S2.** The FPKM values of *RcTPS* genes in different *R. chinensis* tissues.

| Gene ID        | Root   | Stem    | Leaf    | Stamen   | Pistil   | FB_GP   | FB_CP    | FB_PP     | OF_PP     |
|----------------|--------|---------|---------|----------|----------|---------|----------|-----------|-----------|
| <i>RcTPS01</i> | 0.4802 | 0.1833  | 0.0000  | 2.7108   | 2.0556   | 0.1846  | 0.8767   | 0.4174    | 6.9958    |
| <i>RcTPS02</i> | 1.1422 | 1.6723  | 0.1068  | 0.3283   | 2.5626   | 0.2421  | 0.1205   | 0.1480    | 0.5041    |
| <i>RcTPS03</i> | 0.2620 | 0.2428  | 0.0000  | 0.0000   | 0.0000   | 0.0000  | 0.0000   | 0.0000    | 0.0000    |
| <i>RcTPS04</i> | 0.0000 | 0.0000  | 0.4840  | 0.0000   | 0.1796   | 0.0000  | 0.0000   | 0.0000    | 0.0000    |
| <i>RcTPS05</i> | 0.0000 | 0.5817  | 1.4969  | 0.0000   | 0.5264   | 0.0000  | 0.0083   | 0.0000    | 0.0000    |
| <i>RcTPS06</i> | 0.9880 | 0.0510  | 0.0348  | 547.1979 | 114.1788 | 0.6490  | 0.6222   | 12.6447   | 1221.0065 |
| <i>RcTPS07</i> | 0.0000 | 0.3177  | 1.8180  | 0.0262   | 0.0000   | 0.0000  | 0.0000   | 0.0000    | 0.0102    |
| <i>RcTPS08</i> | 0.0000 | 0.0000  | 0.0000  | 0.0218   | 0.3055   | 0.0000  | 0.0000   | 0.0000    | 0.0133    |
| <i>RcTPS09</i> | 0.0000 | 0.0000  | 0.0000  | 0.0000   | 0.0000   | 0.0000  | 0.0000   | 0.0000    | 0.9013    |
| <i>RcTPS10</i> | 0.0127 | 0.0000  | 0.0000  | 0.0000   | 0.0000   | 0.0000  | 0.0000   | 0.0000    | 0.0000    |
| <i>RcTPS11</i> | 0.0501 | 0.0195  | 0.0256  | 0.0000   | 0.2189   | 0.0000  | 0.0000   | 0.0000    | 0.0000    |
| <i>RcTPS12</i> | 0.0000 | 0.0000  | 0.0000  | 0.0000   | 0.0000   | 0.0138  | 0.0000   | 0.0000    | 0.0000    |
| <i>RcTPS13</i> | 0.0000 | 0.0000  | 0.3189  | 0.0000   | 0.3909   | 0.0000  | 0.1114   | 0.0451    | 0.0000    |
| <i>RcTPS14</i> | 0.0000 | 0.0000  | 0.0000  | 0.3365   | 0.1824   | 0.0000  | 0.1648   | 12.6921   | 10.6036   |
| <i>RcTPS15</i> | 0.0000 | 29.2513 | 0.8889  | 0.0000   | 11.9935  | 0.0141  | 0.0347   | 0.0000    | 0.0405    |
| <i>RcTPS16</i> | 0.0624 | 0.1774  | 0.0000  | 201.5982 | 14.2189  | 3.6696  | 5.2582   | 3632.6967 | 3881.7549 |
| <i>RcTPS17</i> | 0.0000 | 0.0000  | 0.0000  | 0.0000   | 0.0000   | 0.0000  | 0.0000   | 0.0000    | 0.0000    |
| <i>RcTPS18</i> | 0.0993 | 3.5836  | 35.7958 | 0.0366   | 0.2065   | 0.0000  | 0.0000   | 0.0000    | 0.1078    |
| <i>RcTPS19</i> | 0.0000 | 0.0182  | 0.0000  | 0.6362   | 0.8910   | 0.8415  | 7.4730   | 9.4191    | 0.5071    |
| <i>RcTPS20</i> | 0.0000 | 0.0000  | 0.0000  | 1.6356   | 9.9552   | 23.9863 | 199.1275 | 62.9024   | 0.4252    |
| <i>RcTPS21</i> | 0.0617 | 0.0000  | 2.8209  | 0.0220   | 2.4499   | 0.0000  | 0.0141   | 0.0000    | 0.0076    |
| <i>RcTPS22</i> | 0.0000 | 0.0338  | 1.0356  | 0.0000   | 1.1461   | 0.0201  | 0.0215   | 0.0000    | 0.0000    |
| <i>RcTPS23</i> | 0.0000 | 0.0000  | 0.0000  | 0.3350   | 0.0000   | 0.0000  | 0.0041   | 0.0067    | 0.0000    |
| <i>RcTPS24</i> | 0.0654 | 58.9367 | 71.0150 | 0.0000   | 0.1474   | 0.3892  | 0.0162   | 0.0000    | 0.0070    |
| <i>RcTPS25</i> | 7.2104 | 0.7112  | 0.0198  | 0.0354   | 0.2088   | 0.0000  | 0.0091   | 0.0000    | 0.0083    |
| <i>RcTPS26</i> | 0.0000 | 0.0000  | 0.0000  | 0.0000   | 0.0000   | 0.0000  | 0.0000   | 0.0000    | 0.0028    |
| <i>RcTPS27</i> | 0.0000 | 0.0000  | 0.8347  | 0.0000   | 0.9326   | 0.0000  | 0.0000   | 0.0000    | 0.0031    |
| <i>RcTPS28</i> | 0.0000 | 0.0845  | 0.8170  | 0.0000   | 0.0358   | 0.0108  | 0.0000   | 0.0169    | 0.2372    |
| <i>RcTPS29</i> | 0.0000 | 0.0000  | 0.0000  | 0.0000   | 0.0000   | 0.0000  | 0.0000   | 0.0000    | 0.0000    |
| <i>RcTPS30</i> | 0.8409 | 0.0000  | 0.0000  | 0.0000   | 0.3194   | 0.0000  | 0.0166   | 0.0000    | 0.0000    |
| <i>RcTPS31</i> | 7.7600 | 10.1484 | 3.3916  | 2.7991   | 19.2997  | 4.6147  | 3.1788   | 1.9191    | 12.5750   |
| <i>RcTPS32</i> | 0.0563 | 0.0000  | 0.0000  | 0.0000   | 0.0000   | 0.0000  | 0.0000   | 0.0000    | 0.0000    |
| <i>RcTPS33</i> | 0.0000 | 0.0000  | 0.0000  | 0.0000   | 0.3197   | 0.0000  | 0.0000   | 0.0000    | 0.0094    |
| <i>RcTPS34</i> | 0.0000 | 0.1045  | 0.0298  | 0.2680   | 0.0096   | 0.0171  | 0.0267   | 40.8715   | 67.3302   |
| <i>RcTPS35</i> | 0.1878 | 0.0804  | 0.6055  | 0.0908   | 0.8645   | 0.1448  | 0.0103   | 0.0128    | 1.8238    |
| <i>RcTPS36</i> | 0.3386 | 0.0182  | 0.0280  | 235.8967 | 27.4991  | 0.2153  | 0.2245   | 4.3817    | 581.9530  |
| <i>RcTPS37</i> | 0.1074 | 0.1879  | 10.0093 | 0.3588   | 5.2917   | 36.4463 | 56.8342  | 13.3891   | 0.2131    |

|                |        |        |        |        |        |        |        |        |         |
|----------------|--------|--------|--------|--------|--------|--------|--------|--------|---------|
| <i>RcTPS38</i> | 0.0844 | 0.0000 | 0.0000 | 0.0000 | 0.0000 | 0.0000 | 0.0000 | 0.0000 | 0.0000  |
| <i>RcTPS39</i> | 0.0000 | 0.1056 | 0.0000 | 0.0086 | 0.0632 | 0.0000 | 0.0000 | 0.0000 | 0.0000  |
| <i>RcTPS40</i> | 0.0427 | 0.0232 | 0.2180 | 0.0000 | 1.2654 | 0.0104 | 0.0088 | 0.0000 | 0.4627  |
| <i>RcTPS41</i> | 0.0000 | 0.0000 | 0.0000 | 0.0279 | 0.2976 | 0.0000 | 0.0139 | 0.0445 | 0.1959  |
| <i>RcTPS42</i> | 0.0000 | 0.0000 | 0.1562 | 0.0000 | 0.0000 | 0.0000 | 0.0000 | 0.0000 | 0.0000  |
| <i>RcTPS43</i> | 0.5753 | 0.0130 | 0.0166 | 0.0000 | 0.1066 | 0.0000 | 0.0000 | 0.0000 | 0.0000  |
| <i>RcTPS44</i> | 0.0000 | 0.0000 | 0.0000 | 0.0242 | 0.0000 | 0.0000 | 0.0000 | 0.0085 | 30.7075 |
| <i>RcTPS45</i> | 0.0000 | 0.0000 | 0.0000 | 0.0000 | 0.0000 | 0.0000 | 0.0000 | 0.0000 | 0.0000  |
| <i>RcTPS46</i> | 0.0000 | 0.0000 | 0.0000 | 0.8824 | 0.0456 | 0.0000 | 0.1746 | 0.1187 | 45.8209 |
| <i>RcTPS47</i> | 0.0891 | 0.2064 | 0.1773 | 0.0039 | 0.0445 | 0.2056 | 0.1006 | 0.0000 | 0.0000  |
| <i>RcTPS48</i> | 0.2596 | 0.0793 | 0.1386 | 0.0000 | 0.0078 | 0.0000 | 0.0000 | 0.0000 | 0.0000  |
| <i>RcTPS49</i> | 0.0149 | 0.1469 | 1.1668 | 0.2792 | 0.5457 | 0.0627 | 0.0439 | 0.2053 | 0.2756  |

All FPKM values were downloaded from NCBI under BioProject PRJNA546486 and BioProject PRJNA351281. FB\_GP: green petals in the flower buds; FB\_CP: color-changing petals in the flower buds; FB\_PP: pink petals in the flower buds; OF\_PP: pink petals of the open flowers.

**Table S3.** The expression values of *RcTPS* genes under 200 mM mannitol treatment for 48 h.

| Gene ID        | CK                   | 12 h                 | 24 h                 | 48 h                |
|----------------|----------------------|----------------------|----------------------|---------------------|
| <i>RcTPS01</i> | 20.5331±4.7816 a     | 8.7991±1.1336 c      | 12.6704±6.8054 bc    | 15.4782±5.4544 ab   |
| <i>RcTPS02</i> | 18.331±3.1179 b      | 23.5195±7.6909 b     | 58.9961±24.095 a     | 70.6734±20.1988 a   |
| <i>RcTPS03</i> | 12.8167±6.5792 b     | 17.2363±0.9203 b     | 40.4733±15.2319 a    | 53.3257±14.3186 a   |
| <i>RcTPS04</i> | 2.18±0.5864 b        | 2.4271±0.2411 b      | 6.0198±2.0727 a      | 5.8405±2.1489 a     |
| <i>RcTPS05</i> | 49.5417±3.4823 b     | 59.2808±1.1228 b     | 90.6046±36.8779 a    | 99.136±20.6175 a    |
| <i>RcTPS06</i> | 7996.0724±795.5345 a | 1738.8111±229.9443 b | 1603.6049±411.3078 b | 639.2552±184.6102 c |
| <i>RcTPS07</i> | 519.5228±101.4995 a  | 112.9524±33.4952 c   | 279.9107±164.275 b   | 171.9421±50.2511 bc |
| <i>RcTPS08</i> | 7.7494±0.4599 b      | 8.0603±0.607 b       | 12.1067±6.0635 a     | 12.1015±2.0397 a    |
| <i>RcTPS09</i> | 15.9412±1.7627 b     | 12.9988±4.2955 b     | 27.5294±10.8596 a    | 34.8638±9.4434 a    |
| <i>RcTPS10</i> | 6.6234±0.6723 b      | 3.4541±4.2148 b      | 27.7012±15.4526 a    | 40.2797±15.1221 a   |
| <i>RcTPS11</i> | 38.6201±6.5629 b     | 21.2161±4.3192 b     | 169.0793±79.2691 a   | 39.1831±10.3998 b   |
| <i>RcTPS12</i> | 2.1176±0.3866 b      | 6.476±0.1047 b       | 60.1771±25.5669 a    | 22.131±6.1822 b     |
| <i>RcTPS13</i> | 3.1537±1.1771 b      | 1.6783±0.3763 b      | 18.1839±6.2777 a     | 3.8568±0.4757 b     |
| <i>RcTPS14</i> | 360.7312±60.0087 a   | 127.0249±9.2762 b    | 180.2859±67.3997 b   | 22.1345±2.2816 c    |
| <i>RcTPS15</i> | 10.9948±1.7483 b     | 6.4514±0.9512 b      | 58.0695±17.8909 a    | 17.1635±4.5193 b    |
| <i>RcTPS16</i> | 473.9112±42.0035 a   | 132.2631±1.3732 b    | 183.9881±85.3515 b   | 17.0735±6.4467 c    |
| <i>RcTPS17</i> | 22.1986±13.441 bc    | 16.111±0.8298 c      | 125.5594±38.7968 a   | 51.2007±14.5989 b   |
| <i>RcTPS18</i> | 4.1986±1.5662 b      | 1.1068±0.5374 b      | 20.7008±10.4711 a    | 8.1014±3.3301 b     |
| <i>RcTPS19</i> | 3.9527±1.3494 b      | 3.4858±0.3965 b      | 31.8489±17.3609 a    | 10.9224±2.683 b     |
| <i>RcTPS20</i> | 4.3357±0.2762 bc     | 1.9105±0.0489 c      | 23.6066±9.6961 a     | 10.8156±1.4063 b    |
| <i>RcTPS21</i> | 22.7627±1.6565 c     | 29.6214±0.8798 c     | 57.6954±32.7117 b    | 93.8743±28.7302 a   |
| <i>RcTPS22</i> | 9.033±0.7107 bc      | 5.1144±0.685 c       | 11.4952±5.5718 b     | 16.8309±4.4958 a    |
| <i>RcTPS23</i> | 49.5186±5.8605 bc    | 45.1601±7.2513 c     | 87.4396±44.0575 ab   | 114.8459±29.8097 a  |
| <i>RcTPS24</i> | 9.1626±0.0845 b      | 7.0602±2.5701 b      | 11.2967±4.7189 b     | 18.7653±5.0947 a    |
| <i>RcTPS25</i> | 7.5702±0.7226 b      | 6.9436±1.5336 b      | 11.5203±4.9061 b     | 18.9715±7.8756 a    |
| <i>RcTPS26</i> | 2.7738±0.746 a       | 2.7544±0.3358 a      | 4.621±2.871 a        | 6.4414±4.1579 a     |
| <i>RcTPS27</i> | 8.1708±0.9611 bc     | 7.074±1.4002 c       | 13.0486±2.5679 b     | 19.2522±6.1437 a    |
| <i>RcTPS28</i> | 2.4619±0.6741 b      | 2.9949±1.0024 b      | 4.5918±2.0553 b      | 7.4907±1.565 a      |
| <i>RcTPS29</i> | 16.1867±0.7108 a     | 6.7123±1.3893 c      | 11.3706±2.5894 b     | 16.235±4.1568 a     |
| <i>RcTPS30</i> | 19.5066±3.7325 b     | 7.2482±0.7249 b      | 36.6826±17.959 a     | 19.6799±2.2535 b    |
| <i>RcTPS31</i> | 8.545±1.5001 b       | 6.544±1.6609 b       | 16.6796±2.3667 a     | 13.6975±5.2567 a    |
| <i>RcTPS32</i> | 23.0706±13.4697 b    | 19.8271±4.3352 b     | 58.434±49.7603 a     | 42.9171±3.3638 ab   |
| <i>RcTPS33</i> | 17.8672±3.342 b      | 11.5845±0.9815 b     | 32.8225±14.4217 a    | 24.6713±4.9581 ab   |
| <i>RcTPS34</i> | 69.4014±1.1282 a     | 7.1451±0.1836 bc     | 13.6169±2.3271 b     | 6.9581±1.4451 c     |
| <i>RcTPS35</i> | 23.2471±1.5824 bc    | 16.4199±1.6223 c     | 62.6582±22.1877 a    | 34.97±7.7386 b      |
| <i>RcTPS36</i> | 7133.4921±694.4568 a | 1351.788±189.3819 b  | 1300.8403±764.9858 b | 601.2937±146.1674 c |
| <i>RcTPS37</i> | 6.4494±1.0472 b      | 4.0177±0.246 b       | 12.0027±8.7822 a     | 10.1488±1.76 ab     |



|                |                       |                     |                    |                    |
|----------------|-----------------------|---------------------|--------------------|--------------------|
| <i>RcTPS38</i> | 18.5272±5.0603 b      | 17.0176±0.6219 b    | 80.742±55.1955 a   | 48.0462±14.7383 ab |
| <i>RcTPS39</i> | 3.1277±0.3027 b       | 1±1.0915 c          | 4.6004±1.5759 a    | 3.7673±0.9437 ab   |
| <i>RcTPS40</i> | 19.4502±1.7878 b      | 17.8552±2.215 b     | 60.3449±21.9262 a  | 45.6461±4.2377 a   |
| <i>RcTPS41</i> | 9.5682±1.3574 b       | 12.2559±6.0865 b    | 39.1778±21.8579 a  | 32.0873±9.8642 a   |
| <i>RcTPS42</i> | 16.2119±1.6863 b      | 12.0749±1.597 b     | 38.0824±15.5616 a  | 24.1334±5.8253 b   |
| <i>RcTPS43</i> | 42.2961±1.6986 a      | 35.6968±5.3958 a    | 85.3709±20.4801 a  | 87.3782±35.1079 a  |
| <i>RcTPS44</i> | 4877.0452±1026.0816 a | 1300.904±121.7703 b | 682.4764±240.143 b | 335.5978±81.0104 b |
| <i>RcTPS45</i> | 3.0769±0.2735 bc      | 1.9469±0.2777 c     | 5.0038±2.1492 a    | 4.3606±1.2688 ab   |
| <i>RcTPS46</i> | 38.3566±5.232 ab      | 20.6318±4.603 b     | 51.4189±24.0382 a  | 45.5292±13.2274 a  |
| <i>RcTPS47</i> | 3.3551±0.5456 b       | 4.7641±0.611 b      | 7.3229±2.2378 a    | 8.5795±1.5639 a    |
| <i>RcTPS48</i> | 21.6899±1.6394 b      | 22.3846±0.9558 b    | 48.4381±52.4429 a  | 44.9235±14.11 ab   |
| <i>RcTPS49</i> | 6.263±0.3611 b        | 5.5414±0.6164 b     | 14.6623±5.7012 a   | 11.141±3.0061 a    |

Means with different letters (a, b and c) are significantly different ( $P < 0.05$ , one-way ANOVA along with Duncan's multiple range test).

**Table S4.** The expression values of *RcTPS* genes under heat treatment (35 °C) for 24 h.

| Gene ID        | CK                    | 6 h                   | 12 h                  | 24 h                 |
|----------------|-----------------------|-----------------------|-----------------------|----------------------|
| <i>RcTPS01</i> | 11.5039±3.8756 b      | 29.8422±5.9904 b      | 66.2849±53.2353 a     | 15.8401±0.8598 b     |
| <i>RcTPS02</i> | 9.712±1.2102 c        | 52.842±4.6038 a       | 44.1836±12.3975 a     | 28.0483±4.3715 b     |
| <i>RcTPS03</i> | 1.6417±0.4766 c       | 8.7708±1.638 a        | 4.7201±1.0805 b       | 4.6555±0.1967 b      |
| <i>RcTPS04</i> | 0.5204±0.1104 b       | 1.1833±0.2696 a       | 1.5677±0.6244 a       | 0.6281±0.1449 b      |
| <i>RcTPS05</i> | 8.0182±0.7837 b       | 17.8516±1.1161 a      | 21.1097±3.995 a       | 9.4756±1.923 b       |
| <i>RcTPS06</i> | 6494.7551±1390.5278 a | 2618.0218±1132.1302 b | 7143.3291±1496.8593 a | 1389.6367±453.9075 b |
| <i>RcTPS07</i> | 3501.6264±215.9918 a  | 633.1079±169.5449 b   | 407.7718±121.7547 b   | 336.0514±63.2676 b   |
| <i>RcTPS08</i> | 1.657±0.4037 bc       | 2.6941±0.2347 ab      | 2.7826±1.5016 a       | 1.43±0.0761 c        |
| <i>RcTPS09</i> | 2.5663±0.3879 b       | 7.2374±0.828 a        | 7.0612±2.075 a        | 3.8416±0.3154 b      |
| <i>RcTPS10</i> | 2.8853±0.4956 b       | 6.5056±0.8094 a       | 4.9292±1.6261 a       | 3.4531±0.3983 b      |
| <i>RcTPS11</i> | 7.2842±0.3087 b       | 18.1794±2.7322 a      | 21.6548±4.1929 a      | 9.6496±0.8097 b      |
| <i>RcTPS12</i> | 99.0999±29.9337 a     | 20.3112±3.7643 b      | 28.7624±6.8542 b      | 10.7811±0.9188 b     |
| <i>RcTPS13</i> | 0.8642±0.0848 a       | 1.7811±0.6151 a       | 2.0438±1.3906 a       | 0.9454±0.1674 a      |
| <i>RcTPS14</i> | 2188.146±116.1929 a   | 988.619±63.4937 c     | 1741.9887±356.9524 b  | 524.7555±57.7652 d   |
| <i>RcTPS15</i> | 2.7021±0.0963 b       | 7.188±0.0358 a        | 6.8489±2.3941 a       | 3.8154±0.5331 b      |
| <i>RcTPS16</i> | 2697.7121±247.0582 a  | 1216.3161±118.0096 c  | 1983.6057±502.6737 b  | 645.6162±50.9965 d   |
| <i>RcTPS17</i> | 5.8643±0.8049 b       | 17.2712±3.4539 a      | 16.9445±4.4601 a      | 9.1675±0.7251 b      |
| <i>RcTPS18</i> | 11.937±1.3384 a       | 2.7618±0.4802 c       | 4.5795±0.9807 b       | 1.4659±0.2503 d      |
| <i>RcTPS19</i> | 1.4259±0.1323 b       | 2.678±0.2881 b        | 4.0061±1.4873 a       | 1.4215±0.0798 b      |
| <i>RcTPS20</i> | 1.1568±0.2836 b       | 2.419±0.1731 a        | 2.1793±0.6107 a       | 1.284±0.1068 b       |
| <i>RcTPS21</i> | 6.8669±0.9697 b       | 17.9767±3.2595 a      | 18.0276±4.3466 a      | 9.542±0.7855 b       |
| <i>RcTPS22</i> | 1.5266±0.1974 c       | 3.2291±0.1856 b       | 4.8003±0.9335 a       | 1.714±0.2378 c       |
| <i>RcTPS23</i> | 10.6461±1.4055 b      | 27.907±5.4184 a       | 30.623±3.1869 a       | 14.8129±0.882 b      |
| <i>RcTPS24</i> | 2.1177±0.2027 c       | 3.7679±1.1102 b       | 5.0037±0.6059 a       | 2±0.635 c            |
| <i>RcTPS25</i> | 1.8733±0.1646 c       | 4.1157±0.3973 b       | 5.7183±1.7967 a       | 2.1846±0.4395 c      |
| <i>RcTPS26</i> | 0.7775±0.0136 b       | 1.753±0.6441 a        | 1.6531±1.0835 a       | 0.9305±0.1957 b      |
| <i>RcTPS27</i> | 7.6328±0.267 a        | 4.3416±0.3846 b       | 5.0488±1.5388 b       | 2.3045±0.1411 c      |
| <i>RcTPS28</i> | 0.7445±0.0843 a       | 1.7357±0.8829 a       | 1.9262±1.2159 a       | 0.9213±0.3126 a      |
| <i>RcTPS29</i> | 1.556±0.1993 c        | 3.3962±0.4646 b       | 4.5196±1.2795 a       | 1.8027±0.2674 c      |
| <i>RcTPS30</i> | 1.6081±0.2174 c       | 3.4952±0.5572 b       | 4.4585±0.5265 a       | 1.8553±0.1287 c      |
| <i>RcTPS31</i> | 4.0043±0.7943 b       | 22.8142±5.2528 a      | 24.1365±7.8372 a      | 12.1097±1.0288 b     |
| <i>RcTPS32</i> | 6.9291±1.2982 b       | 12.8019±3.2325 a      | 13.2998±2.7336 a      | 6.7952±0.6712 b      |
| <i>RcTPS33</i> | 2.4609±0.5045 b       | 6.9668±1.6668 a       | 8.6212±2.216 a        | 3.698±0.5681 b       |
| <i>RcTPS34</i> | 901.4146±37.8652 a    | 49.2625±13.0259 c     | 355.8609±101.1625 b   | 26.1484±6.0341 c     |
| <i>RcTPS35</i> | 4.4192±0.2982 b       | 17.42±4.2061 a        | 22.9259±4.4542 a      | 9.2465±0.9397 b      |
| <i>RcTPS36</i> | 7306.6674±1601.0915 a | 2917.4335±670.9878 b  | 7325.2897±1567.9929 a | 1548.5633±178.9693 b |
| <i>RcTPS37</i> | 1.3375±0.1051 b       | 2.8168±0.7825 a       | 3.8847±1.2246 a       | 1.4952±0.2956 b      |

|                |                      |                      |                     |                      |
|----------------|----------------------|----------------------|---------------------|----------------------|
| <i>RcTPS38</i> | 5.9847±1.2547 b      | 9.0894±1.2624 b      | 11.8641±6.6359 a    | 4.8246±0.5512 b      |
| <i>RcTPS39</i> | 0.6029±0.2086 c      | 1.1704±0.0996 b      | 1.9731±0.3613 a     | 0.6212±0.0804 c      |
| <i>RcTPS40</i> | 4.0866±1.1188 c      | 15.969±3.082 a       | 16.8241±1.861 a     | 8.4763±0.4397 b      |
| <i>RcTPS41</i> | 3.2502±0.5984 b      | 16.8037±15.18 a      | 16.8454±3.5986 a    | 8.9193±6.1001 ab     |
| <i>RcTPS42</i> | 14.4618±4.3306 b     | 25.9899±5.1967 b     | 210.9919±71.3898 a  | 13.7953±1.0957 b     |
| <i>RcTPS43</i> | 7.8003±0.1406 c      | 15.5598±2.7896 b     | 25.6649±6.1572 a    | 8.2591±1.0598 c      |
| <i>RcTPS44</i> | 6605.7785±952.8025 a | 2539.8493±240.6271 b | 5455.03±1778.2561 a | 1348.1429±142.4022 b |
| <i>RcTPS45</i> | 0.5493±0.1917 b      | 1±0.4249 b           | 1.237±0.3499 a      | 0.5308±0.1865 b      |
| <i>RcTPS46</i> | 15.2228±1.4787 a     | 10.4708±2.1117 b     | 12.4362±2.6809 ab   | 5.5579±1.4562 c      |
| <i>RcTPS47</i> | 0.8066±0.2339 b      | 1.4732±0.1963 b      | 2.4749±0.957 a      | 0.782±0.1034 b       |
| <i>RcTPS48</i> | 3.2886±0.3821 c      | 16.1051±2.3015 a     | 14.289±4.3418 a     | 8.5485±0.4374 b      |
| <i>RcTPS49</i> | 0.8599±0.2682 b      | 1.9482±2.1213 ab     | 3.3787±1.8338 a     | 1.0341±1.0085 b      |

Means with different letters (a, b and c) are significantly different ( $P < 0.05$ , one-way ANOVA along with Duncan's multiple range test).

**Table S5.** Primers used for qRT-PCR analysis.

| Gene ID        | Forward primer (5' to 3') | Reverse primer (5' to 3') |
|----------------|---------------------------|---------------------------|
| <i>RcTPS01</i> | AGCCTCACTCATCCAACGCAATG   | TTCCACCACCTAGCAATCTCACAC  |
| <i>RcTPS02</i> | TCATTTGCCTTGGGACCGATTGTG  | TCGAAACTCCGTACAGCCTCCTC   |
| <i>RcTPS03</i> | AACCAACCGCCGTGCCAATATC    | CTTCCCAACCCGTGTGAATCCATC  |
| <i>RcTPS04</i> | CATTTCAGCGCTTGGGGGTAT     | AGAGCAACCGTGTGAAGGTC      |
| <i>RcTPS05</i> | TACCACCACTCATCTCCAGACTGC  | CATGTAACGCCGAGCACCTAACC   |
| <i>RcTPS06</i> | TCCGTGCCACAGATCCACTACC    | TCGGTACAACCTTTCCCTCCTTTGC |
| <i>RcTPS07</i> | CGAATCCACTACGCCAGAGAAGC   | TTAGCAGAGGGTAGCCTGTGGTC   |
| <i>RcTPS08</i> | CAGGCTACCCGCTGCTTGTAAC    | TGCACACCCTTTTACAGGTTTGG   |
| <i>RcTPS09</i> | AGCATTATTGGTGGACGCAGAGTG  | GCCCCTTCATCATGTGTTGTGGAG  |
| <i>RcTPS10</i> | GGTCCTTCACCACCACTCATCTTG  | CCTCGCTTCAATCCTTGGGTTCC   |
| <i>RcTPS11</i> | TACCACCACTCATCTCCAGACTGC  | CATGTAACGCCGAGCACCTAACC   |
| <i>RcTPS12</i> | CCAGCATTTGGGGCGATCATTTTC  | AGCACGCTCTTCACTTCTTCCTTC  |
| <i>RcTPS13</i> | GAGACACCGATTTGAGGCCA      | CCCATGCTGTCTAAGGAGCC      |
| <i>RcTPS14</i> | AAGCACTAACCTTCACCACCACAC  | TTCTAGCCTCGGTAAGCCCTTCC   |
| <i>RcTPS15</i> | TGGTGGAAGGACTTGGACGTGAG   | CACTGACAAAGCCCAGCCGAAG    |
| <i>RcTPS16</i> | GCACTGACCTTCACCACCACAC    | TTCTAGCCTCGGTAAGCCCTTCC   |
| <i>RcTPS17</i> | CACTAACCTTCACCACCGCTCATC  | CCTCGCTTCAATCCTTGGGCATG   |
| <i>RcTPS18</i> | CGAATCCACTACGCCAGAGAAGC   | TAGCATAGGGTAGCCTGTGGTCAC  |
| <i>RcTPS19</i> | TGCGACGACAGCTTCAAGGATTG   | GCTAGTGAATGCAAGGGCCTCATC  |
| <i>RcTPS20</i> | TGGCGTCACAACAAGTACACACC   | ACCAGAATGACCACCCCGGATAC   |
| <i>RcTPS21</i> | ATGTTGTCTCAGCGGTGGAATGC   | AGGGACAGTAGCGATAGGGTGAAG  |
| <i>RcTPS22</i> | GCCAGATGGTTCCACGAAGGATG   | ATGGTGTTACCGACAGAAGTTGCC  |
| <i>RcTPS23</i> | CACTAACCTTCACCACCGCTCATC  | ACAAGTGATGCCTCGCTTCAATCC  |
| <i>RcTPS24</i> | CAACCATGCCTGTCCAAGCTACTC  | TGTGCGCCGAACAACCTTCTGG    |
| <i>RcTPS25</i> | TTCAAAGACGAGCGAATCCCAACC  | CAATATCTCCCATGCCGACCAAGG  |
| <i>RcTPS26</i> | AGCATTTGGGGCGATCAGTTTCTC  | CGGAGCCTTCAGCATCGTGTTTC   |
| <i>RcTPS27</i> | AGGCACTATCCTTCACCACCACTC  | CCACCCTGTTGATGCCCTTTTCG   |
| <i>RcTPS28</i> | TCTAATGCGACCTCTCAACCTTGC  | TAGGCAGTAGGCACGGGTTTCG    |
| <i>RcTPS29</i> | CAAATCAACAGGTCGGGACAGGAG  | GGTGGCTGATGGAACTGGATGAG   |
| <i>RcTPS30</i> | ACCCCAATACTTGCTTGCCAGAAG  | AGTTCGTCAATGGTGCCGTATGC   |
| <i>RcTPS31</i> | GAGGCAACAGAAGCAACTCAGAGG  | AAGCAGCAGCAGTAGTTGATGGTG  |
| <i>RcTPS32</i> | GGTCCTTCACCACCACTCATCTTG  | AATGCCTCGCTTCAATCCTTGGG   |
| <i>RcTPS33</i> | GCATTATTGGTGGAGGCAGAGTGG  | GGCATGAGTCAAAGTCAGCAAAGC  |
| <i>RcTPS34</i> | CCCGCCGCTTTTCAAACAAGTAAG  | TTGGTTGCGTGATCCGTGTAGTTC  |
| <i>RcTPS35</i> | TCGTCCACAGCAGCAATTCTTCG   | TCGTGCCTCGTCAATGGAACAAC   |
| <i>RcTPS36</i> | TCCGTGCCACAGATCCACTACC    | TCGGTACAACCTTTCCCTCCTTTGC |
| <i>RcTPS37</i> | TTCCACGGAGAAGAAACGCTTGAC  | GATGCTCCAGTGTGTGCGAGAC    |

---

|                |                           |                           |
|----------------|---------------------------|---------------------------|
| <i>RcTPS38</i> | GGTCCTTCACCACCACTCATCTTG  | AATGCCTCGCTTCAATCCTTGGG   |
| <i>RcTPS39</i> | GCTTGCGAAGGAGGGGAAGTTG    | TTGTGGAAAGAGCGGCTGACATG   |
| <i>RcTPS40</i> | TCGTCCACAGCAGCAATTCTTCG   | GCCTCGTCAATGGAACAGCCTTG   |
| <i>RcTPS41</i> | CGACTTTGGGACGACTTGGGAAG   | TGCCTCCTCAATGGAACAACCTTG  |
| <i>RcTPS42</i> | AGGACGCACTCCGAGCATGG      | TTTCGGGTCATCCAACAACCACTC  |
| <i>RcTPS43</i> | TACCACCACTCATCTCCAGACTGC  | CATGTAACGCCGAGCACCTAACC   |
| <i>RcTPS44</i> | AGGCACTAGACTTCACCACCACTC  | TCTTGCTTCCACCCTCGGGATG    |
| <i>RcTPS45</i> | GAAGTGAGGAGGACGCTAATGGC   | GGACACGCCTAGACGCTGAATG    |
| <i>RcTPS46</i> | TCAACATGGTTCAAGCCACACTCC  | CCCACAGCACACATGAAACATTTCG |
| <i>RcTPS47</i> | TGCTCAAGGCTATGCTGAAGGAAG  | GGTCCCAAGGCAAATGAGACGTAC  |
| <i>RcTPS48</i> | TACCACGACTCATCTCCAGACTGC  | CATGTAACGCCGAGCACCTAACC   |
| <i>RcTPS49</i> | G TTCCTGACGAGTCTCCTGTGTTG | CCAGTCAAGACCTGCCATTCCTTC  |
| <i>RcGAPDH</i> | GCTGGCAGGTATCCTTTCTG      | GGCGACAATATCAGCCAAGT      |

---

**Table S6.** Functional annotation of RcTPS proteins by Terzyme (<http://www.nipgr.ac.in/terzyme.html>).

| Gene ID        | Score | E-value   | No. of domains | Putative function      |
|----------------|-------|-----------|----------------|------------------------|
| <i>RcTPS01</i> | 830.7 | 1.40E-252 | 1              | Sesquiterpene Synthase |
| <i>RcTPS02</i> | 806.8 | 2.50E-245 | 1              | Sesquiterpene Synthase |
| <i>RcTPS03</i> | 805.4 | 6.30E-245 | 1              | Sesquiterpene Synthase |
| <i>RcTPS04</i> | 800   | 2.80E-243 | 1              | Sesquiterpene Synthase |
| <i>RcTPS05</i> | 796.4 | 3.40E-242 | 1              | Sesquiterpene Synthase |
| <i>RcTPS06</i> | 792.3 | 5.80E-241 | 1              | Sesquiterpene Synthase |
| <i>RcTPS07</i> | 792.2 | 6.20E-241 | 1              | Sesquiterpene Synthase |
| <i>RcTPS08</i> | 792.1 | 6.80E-241 | 1              | Sesquiterpene Synthase |
| <i>RcTPS09</i> | 784.3 | 1.50E-238 | 1              | Sesquiterpene Synthase |
| <i>RcTPS10</i> | 783.9 | 2.10E-238 | 1              | Sesquiterpene Synthase |
| <i>RcTPS11</i> | 780.1 | 2.90E-237 | 1              | Sesquiterpene Synthase |
| <i>RcTPS12</i> | 779.6 | 4.30E-237 | 1              | Sesquiterpene Synthase |
| <i>RcTPS13</i> | 776.9 | 2.80E-236 | 1              | Sesquiterpene Synthase |
| <i>RcTPS14</i> | 776.6 | 3.40E-236 | 1              | Sesquiterpene Synthase |
| <i>RcTPS15</i> | 771.1 | 1.60E-234 | 1              | Sesquiterpene Synthase |
| <i>RcTPS16</i> | 770.3 | 2.80E-234 | 1              | Sesquiterpene Synthase |
| <i>RcTPS17</i> | 768.8 | 7.70E-234 | 1              | Sesquiterpene Synthase |
| <i>RcTPS18</i> | 767.3 | 2.30E-233 | 1              | Sesquiterpene Synthase |
| <i>RcTPS19</i> | 767.3 | 2.30E-233 | 1              | Sesquiterpene Synthase |
| <i>RcTPS20</i> | 763.8 | 2.60E-232 | 1              | Sesquiterpene Synthase |
| <i>RcTPS21</i> | 761.7 | 1.10E-231 | 1              | Sesquiterpene Synthase |
| <i>RcTPS22</i> | 761   | 1.90E-231 | 1              | Sesquiterpene Synthase |
| <i>RcTPS23</i> | 760.3 | 2.90E-231 | 1              | Sesquiterpene Synthase |
| <i>RcTPS24</i> | 755.5 | 8.20E-230 | 1              | Sesquiterpene Synthase |
| <i>RcTPS25</i> | 751   | 1.90E-228 | 1              | Sesquiterpene Synthase |
| <i>RcTPS26</i> | 750.8 | 2.20E-228 | 1              | Sesquiterpene Synthase |
| <i>RcTPS27</i> | 733.9 | 2.90E-223 | 1              | Sesquiterpene Synthase |
| <i>RcTPS28</i> | 720.7 | 2.90E-219 | 1              | Sesquiterpene Synthase |
| <i>RcTPS29</i> | 715.8 | 9.00E-218 | 1              | Sesquiterpene Synthase |
| <i>RcTPS30</i> | 706.3 | 6.50E-215 | 1              | Sesquiterpene Synthase |
| <i>RcTPS31</i> | 705.6 | 1.10E-214 | 1              | Sesquiterpene Synthase |
| <i>RcTPS32</i> | 683.7 | 4.70E-208 | 2              | Sesquiterpene Synthase |
| <i>RcTPS33</i> | 623.6 | 7.30E-190 | 2              | Sesquiterpene Synthase |
| <i>RcTPS34</i> | 611   | 5.00E-186 | 1              | Sesquiterpene Synthase |
| <i>RcTPS35</i> | 692.8 | 8.40E-211 | 1              | Monoterpene Synthase   |
| <i>RcTPS36</i> | 672.6 | 1.10E-204 | 1              | Monoterpene Synthase   |
| <i>RcTPS37</i> | 664.9 | 2.50E-202 | 1              | Monoterpene Synthase   |

|                |       |           |   |                      |
|----------------|-------|-----------|---|----------------------|
| <i>RcTPS38</i> | 622.6 | 1.60E-189 | 1 | Monoterpene Synthase |
| <i>RcTPS39</i> | 622.1 | 2.20E-189 | 1 | Monoterpene Synthase |
| <i>RcTPS40</i> | 616.3 | 1.20E-187 | 1 | Monoterpene Synthase |
| <i>RcTPS41</i> | 555   | 4.70E-169 | 1 | Monoterpene Synthase |
| <i>RcTPS42</i> | 552.2 | 3.20E-168 | 1 | Monoterpene Synthase |
| <i>RcTPS43</i> | 542.4 | 3.00E-165 | 1 | Monoterpene Synthase |
| <i>RcTPS44</i> | 503.5 | 1.80E-153 | 1 | Monoterpene Synthase |
| <i>RcTPS45</i> | 956.4 | 2.90E-290 | 1 | Diterpene Synthase   |
| <i>RcTPS46</i> | 848.4 | 1.30E-257 | 2 | Diterpene Synthase   |
| <i>RcTPS47</i> | 822.1 | 1.10E-249 | 2 | Diterpene Synthase   |
| <i>RcTPS48</i> | 688.9 | 2.00E-209 | 1 | Diterpene Synthase   |
| <i>RcTPS49</i> | 575.7 | 3.60E-175 | 1 | Diterpene Synthase   |
